# Supplementary material for: Synthesis of photo-responsive indium selenides (InSe and In2Se3) from tris(4,6-dimethyl-2-pyrimidylselenolato)indium(iii) as a molecular precursor
Source: Royal Society of Chemistry journal article supplement (doi:10.1039/d1nj06167d), 2022-01-01
Supplement: d1nj06167d1.pdf [file d1nj06167d1.pdf]

## Synthesis of photo-responsive Indium Selenides (InSe and In<sub>2</sub>Se<sub>3</sub>) from tris(4,6-dimethyl-2-pyrimidylselenolato)indium(III) as molecular precursor

Gourab Karmakar,<sup>a,b#</sup> Alpa Y. Shah,<sup>a#</sup> Adish Tyagi,<sup>\*a,b</sup> A. P. Wadawale,<sup>a</sup> G. Kedarnath,<sup>\*a,b</sup> N. Naveen Kumar,<sup>c</sup> Jitendra Bahadur<sup>d</sup>

<sup>a</sup>Chemistry Division, Bhabha Atomic Research Centre, Mumbai- 400 085 (India),

<sup>b</sup>Homi Bhabha National Institute, Anushaktinagar, Mumbai- 400 094 (India)

<sup>c</sup>Materials Science Division, Bhabha Atomic Research Centre, Mumbai- 400 085 (India).

<sup>d</sup>Solid State Physics Division, Bhabha Atomic Research Centre, Mumbai- 400 085 (India).

Email: [tyagia@barc.gov.in](mailto:tyagia@barc.gov.in), [kedar@barc.gov.in](mailto:kedar@barc.gov.in)

<sup>#</sup>Authors contributed equally

### Figure captions

**Figure S1.** UV-vis spectra of In[Sepym(Me-4,6)<sub>2</sub>]<sub>3</sub> (**1**)

**Figure S2.** <sup>77</sup>Se{<sup>1</sup>H} spectra of In[Sepym(Me-4,6)<sub>2</sub>]<sub>3</sub> (**1**)

**Figure S3.** EDS spectra of cubic InSe nanostructures synthesized in (a) OAm, (b) DDT and hexagonal In<sub>2</sub>Se<sub>3</sub> nanostructures synthesized in (c) ODE and (d) furnace respectively.

**Figure S4.** SAED patterns of cubic InSe nanostructures synthesized in (a) OAm, (b) DDT and hexagonal In<sub>2</sub>Se<sub>3</sub> nanostructures synthesized in (c) ODE and (d) furnace respectively.

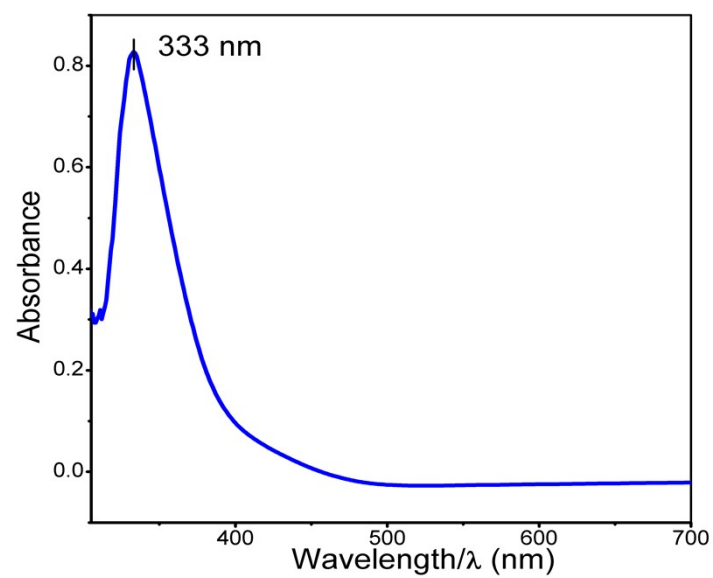

**Figure S1.** UV-vis spectra of  $\text{In}[\text{Sepym}(\text{Me-4,6})_2]_3$  (**1**)

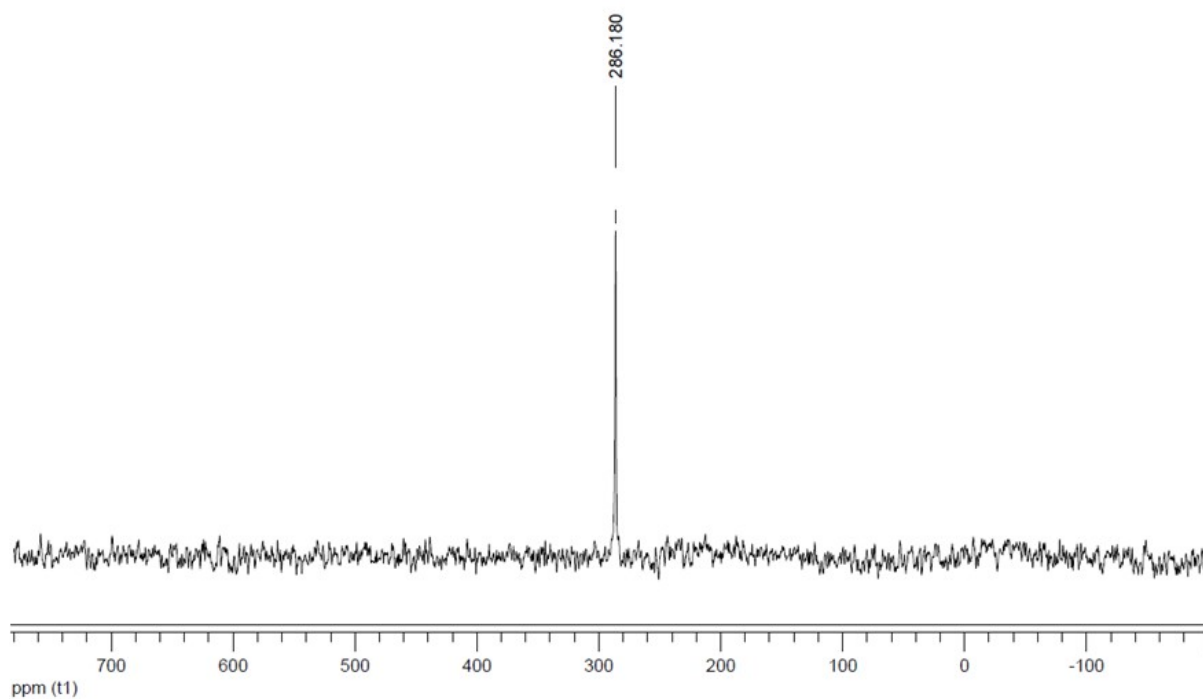

**Figure S2.**  $^{77}\text{Se}\{^1\text{H}\}$  spectra of  $\text{In}[\text{Sepym}(\text{Me-4,6})_2]_3$  (**1**)

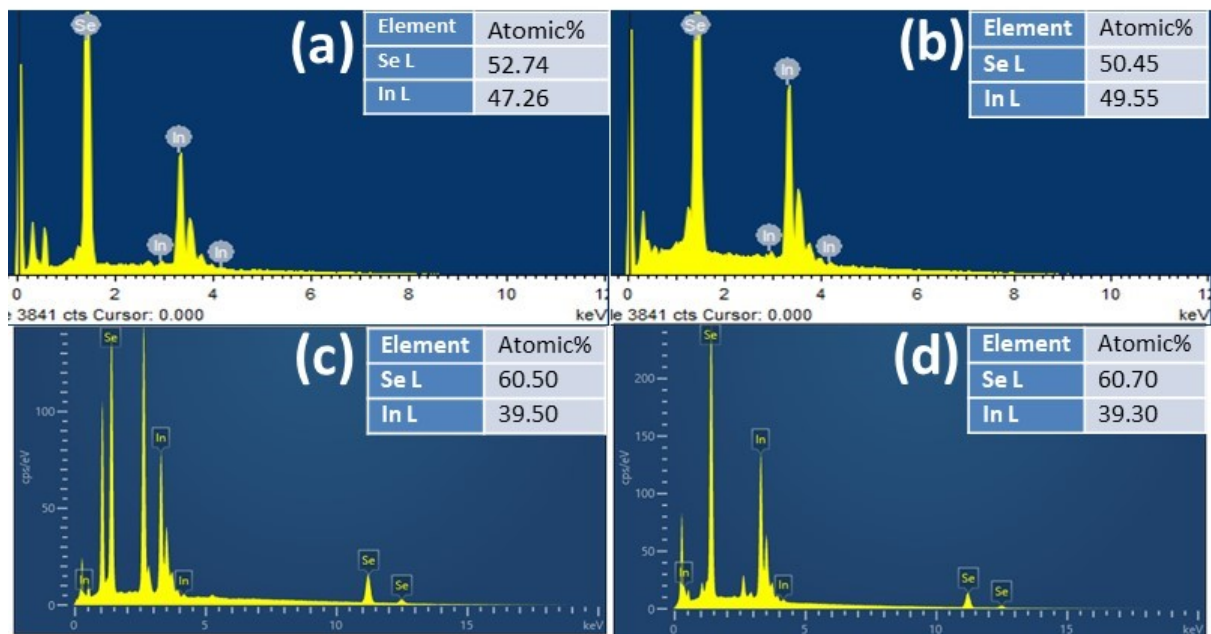

**Figure S3.** EDS spectra of cubic InSe nanostructures synthesized in (a) OAm, (b) DDT and hexagonal  $\text{In}_2\text{Se}_3$  nanostructures synthesized in (c) ODE and (d) furnace respectively.

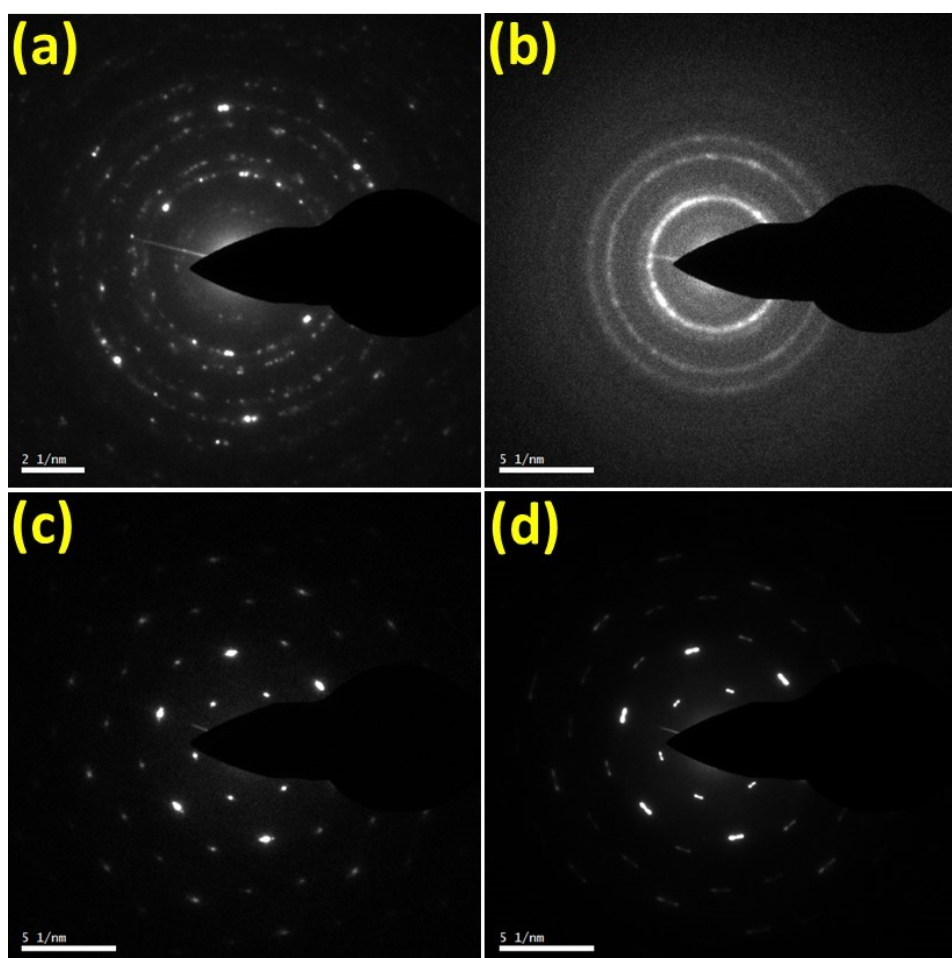

**Figure S4.** SAED patterns of cubic InSe nanostructures synthesized in (a) OAm, (b) DDT and hexagonal In<sub>2</sub>Se<sub>3</sub> nanostructures synthesized in (c) ODE and (d) furnace respectively.
