# Supplementary material for: Synthesis of photo-responsive indium selenides (InSe and In2Se3) from tris(4,6-dimethyl-2-pyrimidylselenolato)indium(iii) as a molecular precursor
Source: Royal Society of Chemistry journal article supplement (doi:10.1039/d1nj06167d), 2022-01-01

## Table of Content

### Synthesis of photo-responsive Indium Selenides (InSe and In<sub>2</sub>Se<sub>3</sub>) from tris(4,6-dimethyl-2-pyrimidylselenolato)indium(III) as molecular precursor

Gourab Karmakar, Alpa Y. Shah, Adish Tyagi, A. P. Wadawale, G. Kedarnath, N. Naveen Kumar, Jitendra Bahadur

Facile and selective synthesis of phase pure photo-responsive InSe and In<sub>2</sub>Se<sub>3</sub> nanostructures employing air-stable In[Sepym(Me-4,6)<sub>2</sub>]<sub>3</sub> as a novel molecular precursor.

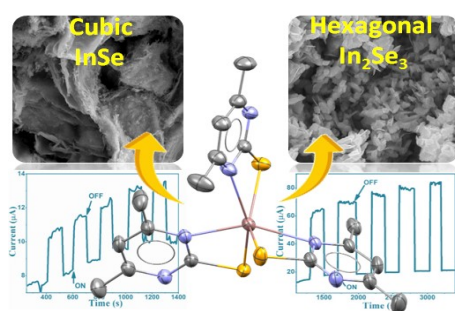

Supplement: d1nj06167d2.pdf [file d1nj06167d2.pdf]
